# Supplementary material for: Metabolic Fluctuations in the Human Stool Obtained from Blastocystis Carriers and Non-Carriers
Source: MDPI journal article supplement (doi:10.3390/metabo11120883), 2021-12-17
Supplement: s1 [file s1]

**Table S1.** Showing samples used in this study including the country or origin, *Blastocystis* carriage status and the type of stool sample collected which relates to symptomology

| <b>Sample ID</b> | <b>Country of origin</b> | <b><i>Blastocystis</i><br/>infection status</b> | <b>Stool type</b> |
|------------------|--------------------------|-------------------------------------------------|-------------------|
| <b>MB/BF 1</b>   | Turkey                   | Positive                                        | Diarrheal         |
| <b>MB/BF 2</b>   | Turkey                   | Positive                                        | Diarrheal         |
| <b>MB/BF 3</b>   | Turkey                   | Positive                                        | Diarrheal         |
| <b>MB/BF 4</b>   | Turkey                   | Positive                                        | Diarrheal         |
| <b>MB/BF 5</b>   | Turkey                   | Positive                                        | Diarrheal         |
| <b>MB/BF 6</b>   | Turkey                   | Positive                                        | Diarrheal         |
| <b>MB/BF 7</b>   | Turkey                   | Positive                                        | Diarrheal         |
| <b>MB/BF 8</b>   | Turkey                   | Positive                                        | Diarrheal         |
| <b>MB/BF 9</b>   | Turkey                   | Positive                                        | Diarrheal         |
| <b>MB/BF 10</b>  | Turkey                   | Positive                                        | Diarrheal         |
| <b>MB/BF 11</b>  | Turkey                   | Positive                                        | Diarrheal         |
| <b>MB/BF 12</b>  | Turkey                   | Positive                                        | Diarrheal         |
| <b>MB/BF 13</b>  | Turkey                   | Positive                                        | Diarrheal         |
| <b>MB/BF 14</b>  | Turkey                   | Positive                                        | Diarrheal         |
| <b>MB/BF 17</b>  | Turkey                   | Positive                                        | Diarrheal         |
| <b>MB/BF 18</b>  | Turkey                   | Positive                                        | Diarrheal         |
| <b>MB/BF 19</b>  | Turkey                   | Positive                                        | Diarrheal         |
| <b>MB/BF 20</b>  | Turkey                   | Positive                                        | Diarrheal         |
| <b>MB/BF 21</b>  | Turkey                   | Positive                                        | Diarrheal         |
| <b>MB/BF 22</b>  | Turkey                   | Positive                                        | Diarrheal         |
| <b>MB/BF 23</b>  | Turkey                   | Positive                                        | Diarrheal         |
| <b>MB/BF 24</b>  | Turkey                   | Positive                                        | Diarrheal         |
| <b>MB/BF 25</b>  | Turkey                   | Positive                                        | Diarrheal         |

|                 |        |          |           |
|-----------------|--------|----------|-----------|
| <b>MB/BF 26</b> | Turkey | Positive | Diarrheal |
| <b>MB/BF 27</b> | Turkey | Positive | Diarrheal |
| <b>MB/BF 28</b> | Turkey | Positive | Diarrheal |
| <b>MB/BF 29</b> | Turkey | Positive | Diarrheal |
| <b>MB/BF 30</b> | Turkey | Positive | Diarrheal |
| <b>MB/BF 31</b> | Turkey | Positive | Diarrheal |
| <b>MB/BF 32</b> | Turkey | Positive | Diarrheal |
| <b>MB/BF 33</b> | Turkey | Positive | Diarrheal |
| <b>MB/BF 34</b> | Turkey | Positive | Diarrheal |
| <b>MB/BF 35</b> | Turkey | Positive | Diarrheal |
| <b>MB/BF 36</b> | Turkey | Positive | Diarrheal |
| <b>MB/BF 37</b> | Turkey | Positive | Diarrheal |
| <b>MB/BF 38</b> | Turkey | Positive | Diarrheal |
| <b>MB/BF 39</b> | Turkey | Positive | Diarrheal |
| <b>MB/BF 40</b> | Turkey | Positive | Diarrheal |
| <b>MB/BF 41</b> | Turkey | Positive | Diarrheal |
| <b>MB/BF 42</b> | Turkey | Positive | Diarrheal |
| <b>MB/BF 43</b> | Turkey | Positive | Diarrheal |
| <b>MB/BF 44</b> | Turkey | Positive | Diarrheal |
| <b>MB/BF 45</b> | Turkey | Positive | Diarrheal |
| <b>MB/BF 46</b> | Turkey | Positive | Diarrheal |
| <b>MB/BF 47</b> | Turkey | Positive | Diarrheal |
| <b>MB/BF 48</b> | Turkey | Positive | Diarrheal |
| <b>MB/BF 49</b> | Turkey | Positive | Diarrheal |
| <b>MB/BF 50</b> | Turkey | Positive | Diarrheal |
| <b>MB/BF 51</b> | Turkey | Positive | Diarrheal |
| <b>MB/BF 52</b> | Turkey | Positive | Diarrheal |
| <b>MB/BF 53</b> | Turkey | Positive | Diarrheal |

|                 |             |          |           |
|-----------------|-------------|----------|-----------|
| <b>MB/BF 54</b> | Turkey      | Positive | Diarrheal |
| <b>MB/BF 55</b> | Turkey      | Positive | Diarrheal |
| <b>MB/BF 56</b> | Turkey      | Positive | Diarrheal |
| <b>MB/BF 57</b> | Turkey      | Positive | Diarrheal |
| <b>MB/N 1</b>   | Turkey      | Negative | Diarrheal |
| <b>MB/N 2</b>   | Turkey      | Negative | Diarrheal |
| <b>MB/N 3</b>   | Turkey      | Negative | Diarrheal |
| <b>MB/N 4</b>   | Turkey      | Negative | Diarrheal |
| <b>MB/N 5</b>   | Turkey      | Negative | Diarrheal |
| <b>MB/N 6</b>   | Turkey      | Negative | Diarrheal |
| <b>MB/N 7</b>   | Turkey      | Negative | Diarrheal |
| <b>MB/N 8</b>   | Turkey      | Negative | Diarrheal |
| <b>MB/N 9</b>   | Turkey      | Negative | Diarrheal |
| <b>MB/N 10</b>  | Turkey      | Negative | Diarrheal |
| <b>MB/N 11</b>  | Turkey      | Negative | Diarrheal |
| <b>MB/N 12</b>  | Turkey      | Negative | Diarrheal |
| <b>MB/N 13</b>  | Turkey      | Negative | Diarrheal |
| <b>MB/N 14</b>  | Turkey      | Negative | Diarrheal |
| <b>MB/N 15</b>  | Turkey      | Negative | Diarrheal |
| <b>MB/N 16</b>  | Turkey      | Negative | Diarrheal |
| <b>Korea 1</b>  | South Korea | Negative | Diarrheal |
| <b>Korea 2</b>  | South Korea | Negative | Diarrheal |
| <b>Korea 3</b>  | South Korea | Negative | Diarrheal |
| <b>Korea 4</b>  | South Korea | Negative | Diarrheal |
| <b>Korea 5</b>  | South Korea | Negative | Diarrheal |
| <b>Korea 6</b>  | South Korea | Negative | Diarrheal |
| <b>Korea 7</b>  | South Korea | Negative | Diarrheal |
| <b>Korea 8</b>  | South Korea | Negative | Diarrheal |

|                 |             |          |               |
|-----------------|-------------|----------|---------------|
| <b>Korea 9</b>  | South Korea | Negative | Diarrheal     |
| <b>Korea 10</b> | South Korea | Negative | Diarrheal     |
| <b>Korea 11</b> | South Korea | Negative | Diarrheal     |
| <b>Korea 12</b> | South Korea | Negative | Diarrheal     |
| <b>Korea 13</b> | South Korea | Negative | Diarrheal     |
| <b>Korea 14</b> | South Korea | Negative | Diarrheal     |
| <b>Korea 15</b> | South Korea | Negative | Diarrheal     |
| <b>Korea 16</b> | South Korea | Negative | Diarrheal     |
| <b>Korea 17</b> | South Korea | Negative | Diarrheal     |
| <b>Korea 18</b> | South Korea | Negative | Diarrheal     |
| <b>Korea 19</b> | South Korea | Negative | Diarrheal     |
| <b>Korea 20</b> | South Korea | Negative | Diarrheal     |
| <b>Korea 21</b> | South Korea | Positive | Non-diarrheal |
| <b>Korea 22</b> | South Korea | Positive | Non-diarrheal |
| <b>Korea 23</b> | South Korea | Positive | Non-diarrheal |
| <b>Korea 24</b> | South Korea | Positive | Non-diarrheal |
| <b>Korea 25</b> | South Korea | Positive | Non-diarrheal |
| <b>Korea 26</b> | South Korea | Positive | Non-diarrheal |
| <b>Korea 27</b> | South Korea | Positive | Non-diarrheal |
| <b>Korea 28</b> | South Korea | Positive | Non-diarrheal |
| <b>Korea 29</b> | South Korea | Positive | Non-diarrheal |
| <b>Korea 30</b> | South Korea | Positive | Non-diarrheal |
| <b>Korea 31</b> | South Korea | Positive | Non-diarrheal |
| <b>Korea 32</b> | South Korea | Positive | Non-diarrheal |
| <b>Korea 33</b> | South Korea | Positive | Non-diarrheal |
| <b>Korea 34</b> | South Korea | Positive | Non-diarrheal |
| <b>Korea 35</b> | South Korea | Positive | Non-diarrheal |
| <b>Korea 36</b> | South Korea | Positive | Non-diarrheal |

|                 |             |          |               |
|-----------------|-------------|----------|---------------|
| <b>Korea 37</b> | South Korea | Positive | Non-diarrheal |
| <b>Korea 38</b> | South Korea | Positive | Non-diarrheal |
| <b>Korea 39</b> | South Korea | Positive | Non-diarrheal |
| <b>Korea 40</b> | South Korea | Positive | Non-diarrheal |
| <b>MFU2</b>     | Thailand    | Negative | Non-diarrheal |
| <b>MFU4</b>     | Thailand    | Negative | Non-diarrheal |
| <b>MFU7</b>     | Thailand    | Negative | Non-diarrheal |
| <b>MFU8</b>     | Thailand    | Negative | Non-diarrheal |
| <b>MFU10</b>    | Thailand    | Negative | Non-diarrheal |
| <b>MFU11</b>    | Thailand    | Negative | Non-diarrheal |
| <b>MFU12</b>    | Thailand    | Negative | Non-diarrheal |
| <b>MFU15</b>    | Thailand    | Negative | Non-diarrheal |
| <b>MFU16</b>    | Thailand    | Negative | Non-diarrheal |
| <b>MFU19</b>    | Thailand    | Negative | Non-diarrheal |
| <b>SNO_1</b>    | Thailand    | Negative | Non-diarrheal |
| <b>SNO_13</b>   | Thailand    | Negative | Non-diarrheal |
| <b>MFU3</b>     | Thailand    | Positive | Non-diarrheal |
| <b>MFU14</b>    | Thailand    | Positive | Non-diarrheal |
| <b>MFU17</b>    | Thailand    | Positive | Non-diarrheal |
| <b>SNO_4</b>    | Thailand    | Positive | Non-diarrheal |
| <b>SNO_6</b>    | Thailand    | Positive | Non-diarrheal |
| <b>SNO_17</b>   | Thailand    | Positive | Non-diarrheal |
| <b>SNO_22</b>   | Thailand    | Positive | Non-diarrheal |
| <b>SNO_23</b>   | Thailand    | Positive | Non-diarrheal |
| <b>SNO_24</b>   | Thailand    | Positive | Non-diarrheal |
| <b>SNO_26</b>   | Thailand    | Positive | Non-diarrheal |
| <b>SNO_27</b>   | Thailand    | Positive | Non-diarrheal |
| <b>SNO_28</b>   | Thailand    | Positive | Non-diarrheal |

|        |          |          |               |
|--------|----------|----------|---------------|
| SNO_29 | Thailand | Positive | Non-diarrheal |
| SNO_33 | Thailand | Positive | Non-diarrheal |
| MFU6   | Thailand | Negative | Non-diarrheal |
| SNO_2  | Thailand | Negative | Non-diarrheal |
| SNO_3  | Thailand | Negative | Non-diarrheal |
| SNO_5  | Thailand | Negative | Non-diarrheal |
| SNO_30 | Thailand | Negative | Non-diarrheal |
| SNO_31 | Thailand | Negative | Non-diarrheal |
| SNO_32 | Thailand | Negative | Non-diarrheal |
| SNO_34 | Thailand | Negative | Non-diarrheal |
| SNO_36 | Thailand | Negative | Non-diarrheal |
| SNO_37 | Thailand | Negative | Non-diarrheal |
| SNO_38 | Thailand | Negative | Non-diarrheal |
| SNO_39 | Thailand | Negative | Non-diarrheal |
| SNO_40 | Thailand | Negative | Non-diarrheal |
| SNO_41 | Thailand | Negative | Non-diarrheal |
| SNO_42 | Thailand | Negative | Non-diarrheal |
| SNO_43 | Thailand | Negative | Non-diarrheal |
| SNO_44 | Thailand | Negative | Non-diarrheal |
| SNO_45 | Thailand | Negative | Non-diarrheal |

**Table S2.** Significant metabolites identified across the three country cohorts. Those in green represent metabolites that were significantly increased in *B+* samples as identified by univariate analysis. Those in blue were significantly decreased in the *B+* samples when compared against *B-*. 5/30 metabolites had different expression results between at least two of the cohorts

| Korea         | Thailand             | Turkey               |
|---------------|----------------------|----------------------|
|               | 2-Hydroxyisovalerate | 2-Hydroxyisovalerate |
|               | 2-Oxocaproate        | 2-Oxocaproate        |
|               | 3-Methylglutarate    | 3-Methylglutarate    |
|               | 3-Methylxanthine     | 3-Methylxanthine     |
|               | Acetamide            | Acetamide            |
|               | Anthranilate         | Anthranilate         |
|               | Arabinitol           | Arabinitol           |
|               | Ascorbate            | Ascorbate            |
| Caprate       |                      | Caprate              |
|               | Creatinine           | Creatinine           |
| Dimethylamine | Dimethylamine        | Dimethylamine        |
|               | Ethanolamine         | Ethanolamine         |
|               | Galactarate          | Galactarate          |
|               | Gentisate            | Gentisate            |
|               | Glutamine            | Glutamine            |
| Glycerol      | Glycerol             | Glycerol             |
|               | Ibuprofen            | Ibuprofen            |
|               | Isopropanol          | Isopropanol          |
|               | Methylmalonate       | Methylmalonate       |
|               | Na-Acetyllysine      | Na-Acetyllysine      |
|               | Niacinamide          | Niacinamide          |
|               | Oxypurinol           | Oxypurinol           |
|               | Pipecolate           | Pipecolate           |
|               | Pyroglutamate        | Pyroglutamate        |
|               | Sebacate             | Sebacate             |
|               | Suberate             | Suberate             |

|        |                        |                        |
|--------|------------------------|------------------------|
|        | Tiglylglycine          | Tiglylglycine          |
|        | Trimethylamine N-oxide | Trimethylamine N-oxide |
|        | Urea                   | Urea                   |
| Valine |                        | Valine                 |



**Table S3.** Listing all 98 significant metabolites identified from the *B*<sup>+</sup> vs *B*<sup>-</sup> sample cohort that were above the log<sub>2</sub> fold change threshold. Univariate analysis was carried out with non-parametric tests on FDR-adjusted values (*p*-adj 0.05).

| Metabolite                   | FC       | log2(FC) | p.adjusted | -log10(p) |
|------------------------------|----------|----------|------------|-----------|
| 1,3-Dimethylurate            | 2.3432   | 1.2285   | 0.010317   | 1.9864    |
| 1,7-Dimethylxanthine         | 2.9837   | 1.5771   | 0.015624   | 1.8062    |
| 2-Aminobutyrate              | 12.325   | 3.6235   | 0.039807   | 1.4       |
| 2-Ethylacrylate              | 10.952   | 3.4531   | 0.00042761 | 3.3689    |
| 2-Hydroxyphenylacetate       | 2.0739   | 1.0523   | 0.016293   | 1.788     |
| 2-Oxobutyrate                | 0.45832  | -1.1256  | 0.00018753 | 3.7269    |
| 2-Oxocaproate                | 0.13433  | -2.8962  | 4.03E-05   | 4.3948    |
| 2-Phenylpropionate           | 0.095736 | -3.3848  | 0.00012105 | 3.917     |
| 2'-Deoxyguanosine            | 3.4089   | 1.7693   | 0.015473   | 1.8104    |
| 2'-Deoxyuridine              | 2.1863   | 1.1285   | 0.0041995  | 2.3768    |
| 3-Hydroxybutyrate            | 0.20049  | -2.3184  | 0.0028443  | 2.546     |
| 3-Hydroxykynurenine          | 0.31107  | -1.6847  | 0.00059918 | 3.2224    |
| 3-Hydroxymandelate           | 2.2928   | 1.1971   | 0.0086029  | 2.0654    |
| 3-Indoxylsulfate             | 0.33435  | -1.5806  | 0.00013963 | 3.855     |
| 3-Methylglutarate            | 2.7238   | 1.4456   | 0.0022112  | 2.6554    |
| 3-Methylxanthine             | 0.45392  | -1.1395  | 0.00079219 | 3.1012    |
| 3,4-Dihydroxybenzeneacetate  | 3.9807   | 1.993    | 0.0012292  | 2.9104    |
| 3,4-Dihydroxymandelate       | 5.8713   | 2.5537   | 0.010422   | 1.9821    |
| 4-Hydroxy-3-methoxymandelate | 3.1275   | 1.645    | 0.0099115  | 2.0039    |
| 5-Hydroxylysine              | 2.5873   | 1.3714   | 0.0032473  | 2.4885    |
| Acetamide                    | 2.0902   | 1.0636   | 0.00080579 | 3.0938    |
| Acetoacetate                 | 2.4306   | 1.2813   | 0.038043   | 1.4197    |
| Agmatine                     | 8.782    | 3.1346   | 0.0096886  | 2.0137    |
| Alanine                      | 4.7198   | 2.2387   | 0.0052514  | 2.2797    |
| Alloisoleucine               | 2.691    | 1.4281   | 0.0038666  | 2.4127    |
| Arginine                     | 5.4029   | 2.4337   | 0.0060656  | 2.2171    |
| Azelate                      | 0.17921  | -2.4803  | 4.03E-05   | 4.3945    |
| beta-Alanine                 | 22.655   | 4.5018   | 0.001153   | 2.9382    |
| Cadaverine                   | 2.0286   | 1.0205   | 0.00042761 | 3.3689    |
| Caprate                      | 0.10525  | -3.2481  | 1.35E-08   | 7.8689    |
| Caprylate                    | 0.31112  | -1.6845  | 0.00043142 | 3.3651    |
| Carnitine                    | 34.039   | 5.0891   | 0.011407   | 1.9428    |
| Catechol                     | 4.3152   | 2.1094   | 0.00016645 | 3.7787    |
| Citraconate                  | 6.5076   | 2.7021   | 0.00027344 | 3.5631    |
| Citrate                      | 3.0546   | 1.611    | 0.020785   | 1.6823    |
| Desaminotyrosine             | 0.44287  | -1.175   | 0.00011065 | 3.9561    |
| Dimethyl sulfone             | 4.3721   | 2.1283   | 0.001153   | 2.9382    |

|                        |          |         |            |        |
|------------------------|----------|---------|------------|--------|
| Dimethylamine          | 0.019985 | -5.645  | 5.14E-06   | 5.2894 |
| Ethanolamine           | 0.20544  | -2.2832 | 5.38E-06   | 5.2691 |
| Ethylene glycol        | 0.36233  | -1.4646 | 0.001153   | 2.9382 |
| Ethylmalonate          | 3.3644   | 1.7504  | 0.00058834 | 3.2304 |
| Ferulate               | 2.0942   | 1.0664  | 0.025546   | 1.5927 |
| Galactarate            | 4.7611   | 2.2513  | 0.027735   | 1.557  |
| Galactonate            | 2.304    | 1.2041  | 0.024005   | 1.6197 |
| Galactose              | 2.1337   | 1.0934  | 0.021956   | 1.6584 |
| Gentisate              | 0.32007  | -1.6435 | 4.72E-05   | 4.3259 |
| Glucarate              | 4.4673   | 2.1594  | 0.0033493  | 2.475  |
| Glucitol               | 11.071   | 3.4688  | 0.0032473  | 2.4885 |
| Glycerol               | 0.16549  | -2.5952 | 5.15E-08   | 7.2879 |
| Glycine                | 8.8731   | 3.1494  | 0.018524   | 1.7323 |
| Glycocholate           | 3.8387   | 1.9406  | 0.00013963 | 3.855  |
| Glycolate              | 28.767   | 4.8463  | 0.045062   | 1.3462 |
| Glycylproline          | 3.1928   | 1.6748  | 0.007361   | 2.1331 |
| Guanidoacetate         | 8.5665   | 3.0987  | 0.016103   | 1.7931 |
| Histamine              | 9.9222   | 3.3107  | 0.0022741  | 2.6432 |
| Homocitrulline         | 3.0174   | 1.5933  | 0.0035856  | 2.4454 |
| Isocaproate            | 0.41304  | -1.2757 | 0.00018995 | 3.7214 |
| Isoeugenol             | 3.0067   | 1.5882  | 0.0030342  | 2.518  |
| Isoleucine             | 8.0192   | 3.0035  | 0.028444   | 1.546  |
| Isopropanol            | 0.19718  | -2.3424 | 1.12E-06   | 5.9503 |
| Mandelate              | 38.966   | 5.2842  | 0.0025928  | 2.5862 |
| Methanol               | 0.17077  | -2.5499 | 8.30E-08   | 7.0808 |
| Methylamine            | 2.1153   | 1.0809  | 0.00098811 | 3.0052 |
| Methylmalonate         | 2.1728   | 1.1195  | 5.23E-05   | 4.2813 |
| myo-Inositol           | 2.7509   | 1.4599  | 4.72E-05   | 4.3259 |
| N-Acetyltyrosine       | 3.1057   | 1.6349  | 0.029146   | 1.5354 |
| N-Carbamoylaspartate   | 9.2635   | 3.2116  | 0.048992   | 1.3099 |
| N-Nitrosodimethylamine | 0.43473  | -1.2018 | 1.78E-06   | 5.7489 |
| NADH                   | 3.4074   | 1.7687  | 0.048907   | 1.3106 |
| NADP+                  | 2.9425   | 1.5571  | 0.0034568  | 2.4613 |
| Nicotinamide N-oxide   | 2.1897   | 1.1308  | 4.24E-05   | 4.373  |
| Nicotinurate           | 5.6684   | 2.5029  | 0.0091951  | 2.0364 |
| O-Phosphoserine        | 2.0433   | 1.0309  | 5.25E-05   | 4.28   |
| Ornithine              | 2.386    | 1.2546  | 0.00058834 | 3.2304 |
| Pipecolate             | 0.097677 | -3.3558 | 9.53E-06   | 5.0211 |
| Proline                | 11.927   | 3.5761  | 0.0086625  | 2.0624 |
| Quinolate              | 2.142    | 1.0989  | 0.0015264  | 2.8163 |
| Salicylurate           | 2.2051   | 1.1408  | 0.047783   | 1.3207 |

|                             |         |         |            |        |
|-----------------------------|---------|---------|------------|--------|
| Sebacate                    | 0.49188 | -1.0236 | 1.29E-06   | 5.8899 |
| Serine                      | 16.977  | 4.0855  | 0.0028167  | 2.5503 |
| Serotonin                   | 12.507  | 3.6446  | 0.0058505  | 2.2328 |
| sn-Glycero-3-phosphocholine | 23.7    | 4.5668  | 0.0030342  | 2.518  |
| Suberate                    | 0.26649 | -1.9078 | 4.71E-05   | 4.3265 |
| Sucrose                     | 0.39553 | -1.3382 | 0.00016251 | 3.7891 |
| Threonate                   | 2.9945  | 1.5823  | 0.00011838 | 3.9267 |
| Thymine                     | 0.40958 | -1.2878 | 0.00030514 | 3.5155 |
| Thymol                      | 0.42434 | -1.2367 | 0.00023831 | 3.6229 |
| trans-4-Hydroxy-L-proline   | 3.2879  | 1.7172  | 0.0054226  | 2.2658 |
| trans-Aconitate             | 3.762   | 1.9115  | 0.022329   | 1.6511 |
| Trimethylamine N-oxide      | 2.6035  | 1.3804  | 0.00016088 | 3.7935 |
| Tropate                     | 0.1741  | -2.522  | 2.81E-05   | 4.5511 |
| Tyramine                    | 3.038   | 1.6031  | 0.00019293 | 3.7146 |
| Urea                        | 15.1    | 3.9165  | 0.0040541  | 2.3921 |
| Valerate                    | 0.47853 | -1.0633 | 0.0059525  | 2.2253 |
| Valine                      | 10.873  | 3.4427  | 0.011699   | 1.9318 |
| Valproate                   | 0.23519 | -2.0881 | 0.00013963 | 3.855  |
| Vanillate                   | 2.3265  | 1.2182  | 0.00026017 | 3.5847 |
| Xylose                      | 2.7722  | 1.471   | 4.72E-05   | 4.3259 |

**Table S4.** Listing all 166 significant metabolites identified from the D-B+ vs D+B- sample cohort that were above the log2 fold change threshold. Univariate analysis was carried out with non-parametric tests on FDR-adjusted values ( $p$ -adj 0.05).

| Metabolite              | FC        | log2(FC) | p.adjusted | -log10(p) |
|-------------------------|-----------|----------|------------|-----------|
| Tryptophan              | 0.0064753 | -7.2708  | 1.03E-05   | 4.9886    |
| 5-Aminopentanoate       | 0.087196  | -3.5196  | 1.03E-05   | 4.9886    |
| Malate                  | 0.029474  | -5.0844  | 5.20E-05   | 4.284     |
| 2-Aminobutyrate         | 0.09944   | -3.33    | 5.24E-05   | 4.281     |
| N-Carbamoyl-b-alanine   | 0.27032   | -1.8872  | 5.24E-05   | 4.281     |
| Valine                  | 0.030959  | -5.0135  | 5.68E-05   | 4.2457    |
| Histamine               | 0.015501  | -6.0114  | 7.10E-05   | 4.149     |
| N-Carbamoylaspartate    | 0.40166   | -1.3159  | 7.10E-05   | 4.149     |
| O-Acetylcholine         | 0.016446  | -5.9261  | 8.61E-05   | 4.0648    |
| Acetoin                 | 0.041546  | -4.5891  | 8.61E-05   | 4.0648    |
| 4-Hydroxyphenylacetate  | 0.042539  | -4.5551  | 8.61E-05   | 4.0648    |
| Agmatine                | 0.12439   | -3.0071  | 8.61E-05   | 4.0648    |
| N-Acetylcysteine        | 0.13757   | -2.8618  | 8.61E-05   | 4.0648    |
| Ornithine               | 0.15953   | -2.6481  | 8.61E-05   | 4.0648    |
| Serine                  | 0.20945   | -2.2553  | 8.61E-05   | 4.0648    |
| Acetone                 | 0.029956  | -5.061   | 0.00011526 | 3.9383    |
| Isoleucine              | 0.065262  | -3.9376  | 0.00011526 | 3.9383    |
| Isocaproate             | 0.11237   | -3.1537  | 0.00011526 | 3.9383    |
| Cystathionine           | 0.29361   | -1.768   | 0.00011526 | 3.9383    |
| Glycolate               | 0.030184  | -5.05    | 0.00014227 | 3.8469    |
| Alanine                 | 0.099347  | -3.3314  | 0.00014227 | 3.8469    |
| Glycylproline           | 0.13035   | -2.9396  | 0.00014244 | 3.8464    |
| 5-Hydroxylysine         | 0.063254  | -3.9827  | 0.00014402 | 3.8416    |
| Pyroglutamate           | 0.15046   | -2.7325  | 0.00015128 | 3.8202    |
| 1,6-Anhydro-b-D-glucose | 0.014523  | -6.1055  | 0.00015385 | 3.8129    |
| Glucarate               | 0.089483  | -3.4823  | 0.00015385 | 3.8129    |
| Tyrosine                | 0.025489  | -5.294   | 0.00016332 | 3.787     |
| Syringate               | 0.085044  | -3.5557  | 0.00016332 | 3.787     |
| Ethylmalonate           | 0.42879   | -1.2217  | 0.00016332 | 3.787     |
| 2-Aminoadipate          | 0.049745  | -4.3293  | 0.00016356 | 3.7863    |
| Catechol                | 0.054689  | -4.1926  | 0.00016356 | 3.7863    |
| 2-Phosphoglycerate      | 0.33262   | -1.588   | 0.00016356 | 3.7863    |
| Urea                    | 0.077289  | -3.6936  | 0.00017856 | 3.7482    |
| Glucose-1-phosphate     | 0.019494  | -5.6808  | 0.00019351 | 3.7133    |

|                      |           |         |            |        |
|----------------------|-----------|---------|------------|--------|
| Pantothenate         | 0.096613  | -3.3716 | 0.00019351 | 3.7133 |
| Taurine              | 0.070452  | -3.8272 | 0.00020884 | 3.6802 |
| 3-Hydroxyisobutyrate | 0.038973  | -4.6814 | 0.0002184  | 3.6608 |
| Mandelate            | 0.069729  | -3.8421 | 0.0002184  | 3.6608 |
| Salicylate           | 0.049252  | -4.3437 | 0.00022068 | 3.6562 |
| Tyramine             | 0.09805   | -3.3503 | 0.00022068 | 3.6562 |
| Cadaverine           | 0.22688   | -2.14   | 0.00022068 | 3.6562 |
| Glycine              | 0.030692  | -5.026  | 0.00022947 | 3.6393 |
| Cholate              | 0.051877  | -4.2688 | 0.00026676 | 3.5739 |
| Anserine             | 0.11895   | -3.0715 | 0.00032327 | 3.4904 |
| Phenylalanine        | 0.02611   | -5.2593 | 0.0003363  | 3.4733 |
| beta-Alanine         | 0.025178  | -5.3117 | 0.00034606 | 3.4608 |
| Mannitol             | 0.035323  | -4.8233 | 0.00034606 | 3.4608 |
| Citrate              | 0.13153   | -2.9266 | 0.00034606 | 3.4608 |
| 2-Methylglutarate    | 0.017032  | -5.8756 | 0.0003506  | 3.4552 |
| Alloisoleucine       | 0.13523   | -2.8865 | 0.00036169 | 3.4417 |
| myo-Inositol         | 0.016193  | -5.9485 | 0.00037286 | 3.4285 |
| 2-Hydroxyisovalerate | 0.099114  | -3.3348 | 0.00037286 | 3.4285 |
| 2-Phenylpropionate   | 0.25871   | -1.9506 | 0.00037286 | 3.4285 |
| Propylene glycol     | 0.32711   | -1.6121 | 0.00037286 | 3.4285 |
| Arginine             | 0.22378   | -2.1599 | 0.00037397 | 3.4272 |
| Acetoacetate         | 0.063259  | -3.9826 | 0.00037429 | 3.4268 |
| Hydroxyacetone       | 0.14099   | -2.8263 | 0.00040834 | 3.389  |
| Aspartate            | 0.087638  | -3.5123 | 0.00046565 | 3.3319 |
| Carnosine            | 0.087193  | -3.5197 | 0.00049303 | 3.3071 |
| Melatonin            | 0.077057  | -3.6979 | 0.0004975  | 3.3032 |
| Serotonin            | 0.0067477 | -7.2114 | 0.00049896 | 3.3019 |
| Threonate            | 0.028682  | -5.1237 | 0.000582   | 3.2351 |
| 4-Carboxyglutamate   | 0.091621  | -3.4482 | 0.00060238 | 3.2201 |
| Glutathione          | 0.079087  | -3.6604 | 0.00062219 | 3.2061 |
| Ethanolamine         | 0.12466   | -3.0039 | 0.00062219 | 3.2061 |
| 3-Aminoisobutyrate   | 0.15519   | -2.6879 | 0.00062219 | 3.2061 |
| Dimethylamine        | 5.0052    | 2.3234  | 0.00062219 | 3.2061 |
| Gentisate            | 0.36132   | -1.4687 | 0.00062219 | 3.2061 |
| Xanthine             | 0.081808  | -3.6116 | 0.00071124 | 3.148  |
| Gluconate            | 0.13922   | -2.8446 | 0.00071852 | 3.1436 |
| 5-Methoxysalicylate  | 0.039778  | -4.6519 | 0.00072025 | 3.1425 |
| Sarcosine            | 0.20625   | -2.2776 | 0.00092216 | 3.0352 |
| 1,3-Diaminopropane   | 0.038148  | -4.7122 | 0.00099977 | 3.0001 |
| Proline              | 0.031013  | -5.011  | 0.0010984  | 2.9593 |
| Methionine           | 0.022969  | -5.4442 | 0.0012786  | 2.8932 |

|                                |          |         |           |        |
|--------------------------------|----------|---------|-----------|--------|
| Citraconate                    | 0.015437 | -6.0175 | 0.0013455 | 2.8711 |
| Creatine phosphate             | 0.07838  | -3.6734 | 0.0014    | 2.8539 |
| Isocitrate                     | 0.10656  | -3.2302 | 0.0014778 | 2.8304 |
| Methylmalonate                 | 0.10842  | -3.2053 | 0.0015561 | 2.808  |
| Creatinine                     | 0.020371 | -5.6173 | 0.0016522 | 2.782  |
| Tartrate                       | 0.35473  | -1.4952 | 0.0016522 | 2.782  |
| 5-Hydroxytryptophan            | 0.055367 | -4.1748 | 0.0017746 | 2.7509 |
| Saccharopine                   | 0.18641  | -2.4234 | 0.0017894 | 2.7473 |
| Creatine                       | 0.013553 | -6.2053 | 0.001981  | 2.7031 |
| pi-Methylhistidine             | 0.022082 | -5.501  | 0.00213   | 2.6716 |
| Quinolate                      | 0.089148 | -3.4877 | 0.0021434 | 2.6689 |
| O-Phosphoserine                | 0.072775 | -3.7804 | 0.0022189 | 2.6539 |
| trans-4-Hydroxy-L-proline      | 0.13246  | -2.9164 | 0.0022945 | 2.6393 |
| trans-Aconitate                | 0.16084  | -2.6363 | 0.0023425 | 2.6303 |
| 5-Aminolevulinate              | 0.088668 | -3.4954 | 0.0024461 | 2.6115 |
| Lactate                        | 0.082024 | -3.6078 | 0.0025085 | 2.6006 |
| 2-Hydroxyisobutyrate           | 0.020254 | -5.6256 | 0.0025226 | 2.5981 |
| Biotin                         | 0.074007 | -3.7562 | 0.0025226 | 2.5981 |
| 2-Hydroxyglutarate             | 0.24805  | -2.0113 | 0.0025226 | 2.5981 |
| Histidine                      | 0.041302 | -4.5976 | 0.0025922 | 2.5863 |
| 2-Hydroxybutyrate              | 0.15813  | -2.6609 | 0.0026943 | 2.5696 |
| 3-Methyl-2-oxovalerate         | 0.38452  | -1.3789 | 0.0026943 | 2.5696 |
| N-Acetylaspartate              | 0.11419  | -3.1305 | 0.002712  | 2.5667 |
| Homovanillate                  | 0.12303  | -3.0229 | 0.0027171 | 2.5659 |
| Erythritol                     | 0.18981  | -2.3973 | 0.0027963 | 2.5534 |
| Threonine                      | 0.06448  | -3.955  | 0.0032379 | 2.4897 |
| Lactose                        | 0.12275  | -3.0262 | 0.0035807 | 2.446  |
| 2-Hydroxy-3-methylvalerate     | 0.30845  | -1.6969 | 0.0038347 | 2.4163 |
| Glutamate                      | 0.08942  | -3.4833 | 0.0040781 | 2.3895 |
| Homocitrulline                 | 0.19853  | -2.3325 | 0.0041559 | 2.3813 |
| Citrulline                     | 0.14825  | -2.7539 | 0.0044189 | 2.3547 |
| Glucitol                       | 0.011332 | -6.4634 | 0.0047913 | 2.3196 |
| Glutaric acid monomethyl ester | 0.288    | -1.7958 | 0.0050111 | 2.3001 |
| 4-Guanidinobutanoate           | 0.14631  | -2.7729 | 0.005095  | 2.2929 |
| Isobutyrate                    | 0.15284  | -2.7099 | 0.005095  | 2.2929 |
| Ascorbate                      | 0.12268  | -3.027  | 0.0051948 | 2.2844 |
| Isoeugenol                     | 0.23945  | -2.0622 | 0.0051948 | 2.2844 |
| Xylitol                        | 0.15274  | -2.7109 | 0.0052433 | 2.2804 |
| 3,5-Dibromotyrosine            | 0.02308  | -5.4372 | 0.0056153 | 2.2506 |

|                             |           |         |           |        |
|-----------------------------|-----------|---------|-----------|--------|
| N6-Acetyllysine             | 0.20316   | -2.2993 | 0.0056622 | 2.247  |
| Glucose-6-phosphate         | 0.096187  | -3.378  | 0.0065013 | 2.187  |
| Galactarate                 | 0.28395   | -1.8163 | 0.006643  | 2.1776 |
| Xanthurenate                | 0.11585   | -3.1097 | 0.0067592 | 2.1701 |
| Succinylacetone             | 0.17245   | -2.5358 | 0.0067592 | 2.1701 |
| 3-Phenyllactate             | 0.12367   | -3.0154 | 0.0072422 | 2.1401 |
| sn-Glycero-3-phosphocholine | 0.018608  | -5.7479 | 0.0081437 | 2.0892 |
| o-Cresol                    | 0.075415  | -3.729  | 0.0087883 | 2.0561 |
| Fumarate                    | 0.14244   | -2.8116 | 0.0090016 | 2.0457 |
| 3-Methylglutarate           | 0.31829   | -1.6516 | 0.009069  | 2.0424 |
| O-Phosphoethanolamine       | 0.0089106 | -6.8103 | 0.010815  | 1.966  |
| 4-Aminobutyrate             | 2.2609    | 1.1769  | 0.010815  | 1.966  |
| Pyruvate                    | 0.10514   | -3.2496 | 0.012231  | 1.9125 |
| Betaine                     | 0.080019  | -3.6435 | 0.012547  | 1.9015 |
| Allantoin                   | 0.1137    | -3.1367 | 0.012647  | 1.898  |
| 4-Aminohippurate            | 0.186     | -2.4266 | 0.013275  | 1.877  |
| Trimethylamine              | 0.28129   | -1.8299 | 0.013771  | 1.861  |
| Galactonate                 | 0.30246   | -1.7252 | 0.013847  | 1.8587 |
| Tiglylglycine               | 0.35794   | -1.4822 | 0.01409   | 1.8511 |
| Glycerate                   | 0.05024   | -4.315  | 0.014542  | 1.8374 |
| 3-Hydroxy-3-methylglutarate | 0.099744  | -3.3256 | 0.014542  | 1.8374 |
| 2-Ethylacrylate             | 0.21629   | -2.209  | 0.014727  | 1.8319 |
| Lactulose                   | 0.11917   | -3.0689 | 0.015406  | 1.8123 |
| tau-Methylhistidine         | 0.062662  | -3.9963 | 0.015661  | 1.8052 |
| Urocanate                   | 0.061245  | -4.0293 | 0.015756  | 1.8026 |
| Riboflavin                  | 0.28728   | -1.7995 | 0.015756  | 1.8026 |
| Butanone                    | 0.092802  | -3.4297 | 0.01734   | 1.761  |
| Trehalose                   | 0.25472   | -1.973  | 0.017735  | 1.7512 |
| N-Acetyltyrosine            | 0.073225  | -3.7715 | 0.018079  | 1.7428 |
| Choline                     | 0.095089  | -3.3946 | 0.018198  | 1.74   |
| Fructose                    | 0.10321   | -3.2763 | 0.018634  | 1.7297 |
| NADPH                       | 0.011286  | -6.4693 | 0.020708  | 1.6839 |
| O-Phosphocholine            | 0.11779   | -3.0857 | 0.020708  | 1.6839 |
| Imidazole                   | 0.12154   | -3.0405 | 0.020708  | 1.6839 |
| 5-Hydroxyindole-3-acetate   | 0.1763    | -2.5039 | 0.024487  | 1.6111 |
| Indole-3-lactate            | 0.21656   | -2.2072 | 0.025433  | 1.5946 |
| NADH                        | 0.10792   | -3.2119 | 0.025838  | 1.5877 |
| N-Methylhydantoin           | 0.3113    | -1.6836 | 0.027764  | 1.5565 |
| 5,6-Dihydrothymine          | 0.34175   | -1.549  | 0.028379  | 1.547  |



|                        |          |         |          |        |
|------------------------|----------|---------|----------|--------|
| Homocystine            | 0.49276  | -1.0211 | 0.028637 | 1.5431 |
| Arabinose              | 0.14465  | -2.7893 | 0.031633 | 1.4999 |
| 2-Hydroxyvalerate      | 0.24483  | -2.0301 | 0.033856 | 1.4704 |
| 3-Methylxanthine       | 0.31724  | -1.6564 | 0.033856 | 1.4704 |
| N-Isovaleroylglycine   | 0.14851  | -2.7514 | 0.036257 | 1.4406 |
| 3-Hydroxykynurenine    | 3.61     | 1.852   | 0.036257 | 1.4406 |
| 1,7-Dimethylxanthine   | 0.10909  | -3.1964 | 0.038387 | 1.4158 |
| Caffeine               | 0.14031  | -2.8333 | 0.038901 | 1.41   |
| 3,4-Dihydroxymandelate | 0.17346  | -2.5274 | 0.039551 | 1.4028 |
| Acetylsalicylate       | 0.12166  | -3.0391 | 0.040746 | 1.3899 |
| NAD+                   | 0.042684 | -4.5501 | 0.044468 | 1.352  |
| N-Acetylserotonin      | 0.38487  | -1.3775 | 0.047499 | 1.3233 |
| 2-Hydroxyisocaproate   | 0.096102 | -3.3793 | 0.048592 | 1.3134 |

**Table S5.** Listing all 6 significant metabolites identified from the D-*B*+ vs D-*B*- sample cohort that were above the log2 fold change threshold. Univariate analysis was carried out with non-parametric tests on FDR-adjusted values (*p*-adj 0.05).

| Metabolite      | FC     | log2(FC) | p.adjusted | -log10(p) |
|-----------------|--------|----------|------------|-----------|
| Dimethylamine   | 7.268  | 2.8616   | 0.0011629  | 2.9345    |
| Formate         | 2.6002 | 1.3786   | 0.0058908  | 2.2298    |
| Glycerol        | 10.071 | 3.3322   | 0.0094025  | 2.0268    |
| Niacinamide     | 4.1112 | 2.0396   | 0.010364   | 1.9845    |
| Ethylene glycol | 4.0168 | 2.006    | 0.012054   | 1.9189    |
| Methanol        | 30.154 | 4.9143   | 0.023092   | 1.6365    |

**Table S6.** Listing all 51 significant metabolites identified from the B+(D+ and D-) excluding Korea D+ sample cohort that were above the log2 fold change threshold. Univariate analysis was carried out with non-parametric tests on FDR-adjusted values ( $p$ -adj 0.05).

| Metabolite                   | FC       | log2(FC) | p.adjusted | -log10(p) |
|------------------------------|----------|----------|------------|-----------|
| Methanol                     | 5.6077   | 2.4874   | 1.51E-05   | 4.8211    |
| Dimethylamine                | 67.623   | 6.0794   | 2.95E-05   | 4.5307    |
| Glycerol                     | 5.6219   | 2.4911   | 2.95E-05   | 4.5307    |
| Caprate                      | 6.7302   | 2.7506   | 5.62E-05   | 4.2507    |
| Thymine                      | 8.3579   | 3.0631   | 0.00034693 | 3.4598    |
| Azelate                      | 10.725   | 3.4229   | 0.0014216  | 2.8472    |
| Ibuprofen                    | 4.1123   | 2.0399   | 0.0014216  | 2.8472    |
| Isopropanol                  | 4.5595   | 2.1889   | 0.0018016  | 2.7443    |
| Xylose                       | 0.33653  | -1.5712  | 0.0030442  | 2.5165    |
| Ethanolamine                 | 3.5951   | 1.846    | 0.003249   | 2.4883    |
| Methylguanidine              | 2.8991   | 1.5356   | 0.0058903  | 2.2299    |
| Pipecolate                   | 9.4372   | 3.2384   | 0.0068859  | 2.162     |
| Glycocholate                 | 0.23462  | -2.0916  | 0.0071023  | 2.1486    |
| 4-Hydroxy-3-methoxymandelate | 0.3773   | -1.4062  | 0.0071023  | 2.1486    |
| 2-Hydroxyisobutyrate         | 5.1889   | 2.3754   | 0.0076169  | 2.1182    |
| myo-Inositol                 | 0.28738  | -1.799   | 0.0089813  | 2.0467    |
| Vanillate                    | 0.41785  | -1.2589  | 0.0099369  | 2.0028    |
| Tropate                      | 5.2946   | 2.4045   | 0.011018   | 1.9579    |
| Methylmalonate               | 0.48117  | -1.0554  | 0.011047   | 1.9568    |
| Histamine                    | 0.082246 | -3.6039  | 0.012418   | 1.906     |
| 3-Methylxanthine             | 2.3428   | 1.2282   | 0.012418   | 1.906     |
| Trimethylamine N-oxide       | 0.36614  | -1.4495  | 0.012422   | 1.9058    |
| Ethylene glycol              | 2.9668   | 1.5689   | 0.013608   | 1.8662    |
| Suberate                     | 2.7252   | 1.4464   | 0.014021   | 1.8532    |
| 2-Oxocaproate                | 6.4484   | 2.6889   | 0.014238   | 1.8466    |
| Urea                         | 3.382    | 1.7579   | 0.01617    | 1.7913    |
| 3-Indoxylsulfate             | 3.0308   | 1.5997   | 0.016179   | 1.7911    |
| Gentisate                    | 2.4963   | 1.3198   | 0.016179   | 1.7911    |
| Glycerate                    | 0.45804  | -1.1265  | 0.016371   | 1.7859    |
| 2-Phenylpropionate           | 10.331   | 3.3689   | 0.0182     | 1.7399    |
| Oxypurinol                   | 2.3398   | 1.2264   | 0.019816   | 1.703     |
| O-Phosphoserine              | 0.35184  | -1.507   | 0.020555   | 1.6871    |
| Benzoate                     | 0.24348  | -2.0381  | 0.021948   | 1.6586    |
| 3-Methylglutarate            | 3.5607   | 1.8322   | 0.021965   | 1.6583    |

|                                |         |         |          |        |
|--------------------------------|---------|---------|----------|--------|
| Creatinine                     | 5.0101  | 2.3248  | 0.02214  | 1.6548 |
| N-Acetylglutamine              | 0.41526 | -1.2679 | 0.02214  | 1.6548 |
| Pyroglutamate                  | 2.1607  | 1.1115  | 0.023205 | 1.6344 |
| Hydroxyacetone                 | 0.44135 | -1.18   | 0.026973 | 1.5691 |
| Caprylate                      | 6.612   | 2.7251  | 0.027409 | 1.5621 |
| N-Acetylserotonin              | 0.4305  | -1.2159 | 0.029847 | 1.5251 |
| Glutaric acid monomethyl ester | 2.1003  | 1.0706  | 0.030869 | 1.5105 |
| Threonate                      | 0.23542 | -2.0867 | 0.033517 | 1.4747 |
| Thymol                         | 2.0768  | 1.0544  | 0.033517 | 1.4747 |
| Citraconate                    | 0.11474 | -3.1236 | 0.033889 | 1.4699 |
| Sucrose                        | 3.7947  | 1.924   | 0.033889 | 1.4699 |
| Protocatechuate                | 0.45972 | -1.1212 | 0.033889 | 1.4699 |
| Valproate                      | 3.8092  | 1.9295  | 0.03545  | 1.4504 |
| Lactate                        | 0.39322 | -1.3466 | 0.037848 | 1.422  |
| Catechol                       | 0.16268 | -2.6199 | 0.041385 | 1.3832 |
| 3-Hydroxykynurenine            | 3.0838  | 1.6247  | 0.041722 | 1.3796 |
| trans-4-Hydroxy-L-proline      | 0.36018 | -1.4732 | 0.045623 | 1.3408 |

**Table S7.** Details of pathway analysis for the Thai cohort, only values with p-adjust <0.05 are included. The 'Total' column equates to the total number of compounds in the given pathway and the 'Hits' are compounds from this dataset that match to a given pathway. The p-adjust values are adjusted Raw p-values following the Holm-Bonferroni method. FDR is false discovery rate adjusted p-value and the Impact is the impact value was calculated from pathway topology analysis.

| Pathway                                           | Total<br>Cmpd | Hits | Raw p          | -LOG10(p) | Holm<br>adjust | FDR            | Impact  |
|---------------------------------------------------|---------------|------|----------------|-----------|----------------|----------------|---------|
| Pentose and<br>glucuronate<br>interconversions    | 18            | 7    | 9.18E-<br>06   | 5.037     | 0.00049<br>594 | 0.00049<br>594 | 0.57812 |
| Galactose<br>metabolism                           | 27            | 9    | 2.69E-<br>05   | 4.57      | 0.00142<br>64  | 0.00072<br>668 | 0.13634 |
| Amino sugar and<br>nucleotide sugar<br>metabolism | 37            | 9    | 8.14E-<br>05   | 4.0892    | 0.00423<br>47  | 0.00146<br>58  | 0.28103 |
| Tyrosine<br>metabolism                            | 42            | 11   | 0.00034<br>722 | 3.4594    | 0.01770<br>8   | 0.00468<br>75  | 0.24403 |
| Ascorbate and<br>aldarate<br>metabolism           | 8             | 5    | 0.00047<br>618 | 3.3222    | 0.02380<br>9   | 0.00514<br>27  | 1       |
| Starch and sucrose<br>metabolism                  | 18            | 5    | 0.00083<br>072 | 3.0805    | 0.04070<br>5   | 0.00727<br>03  | 0.33334 |
| Phosphatidylinosit<br>ol signaling system         | 28            | 1    | 0.00099<br>831 | 3.0007    | 0.04791<br>9   | 0.00727<br>03  | 0.03736 |

**Table S8.** Details of pathway analysis for the Turkey cohort, only values with  $p$ -adjust  $<0.05$  are included. The 'Total' column equates to the total number of compounds in the given pathway and the 'Hits' are compounds from this dataset that match to a given pathway. The  $p$ -adjust values are adjusted Raw  $p$ -values following the Holm-Bonferroni method. FDR is false discovery rate adjusted  $p$ -value and the Impact is the impact value was calculated from pathway topology analysis

| Pathway                                     | Total<br>Cmpd | Hits | Raw p   | -LOG10(p) | Holm adjust | FDR     | Impact  |
|---------------------------------------------|---------------|------|---------|-----------|-------------|---------|---------|
| Aminoacyl-tRNA biosynthesis                 | 48            | 19   | 0.00000 | 15.878    | 0.00000     | 0.00000 | 0.00000 |
| Alanine, aspartate and glutamate metabolism | 28            | 11   | 0.00000 | 8.1308    | 0.00000     | 0.00000 | 0.62340 |
| Glycine, serine and threonine metabolism    | 33            | 15   | 0.00000 | 6.8597    | 0.00001     | 0.00000 | 0.55748 |
| Arginine and proline metabolism             | 38            | 11   | 0.00000 | 6.7482    | 0.00001     | 0.00000 | 0.44293 |
| Selenocompound metabolism                   | 20            | 1    | 0.00000 | 6.6831    | 0.00001     | 0.00000 | 0.00000 |
| Pantothenate and CoA biosynthesis           | 19            | 7    | 0.00000 | 6.4734    | 0.00002     | 0.00000 | 0.05714 |
| Arginine biosynthesis                       | 14            | 10   | 0.00000 | 6.3463    | 0.00002     | 0.00000 | 0.48223 |
| Lysine degradation                          | 25            | 5    | 0.00000 | 6.3226    | 0.00002     | 0.00000 | 0.18780 |
| Histidine metabolism                        | 16            | 8    | 0.00000 | 6.1662    | 0.00003     | 0.00000 | 0.67212 |
| Primary bile acid biosynthesis              | 46            | 4    | 0.00000 | 5.8995    | 0.00006     | 0.00001 | 0.02321 |
| Glyoxylate and dicarboxylate metabolism     | 32            | 12   | 0.00000 | 5.6572    | 0.00010     | 0.00001 | 0.32012 |
| Glutathione metabolism                      | 28            | 8    | 0.00000 | 5.4103    | 0.00017     | 0.00002 | 0.40365 |
| Valine, leucine and isoleucine degradation  | 40            | 8    | 0.00000 | 5.3959    | 0.00017     | 0.00002 | 0.07143 |
| Pyrimidine metabolism                       | 39            | 13   | 0.00000 | 5.3916    | 0.00017     | 0.00002 | 0.37937 |
| Valine, leucine and isoleucine biosynthesis | 8             | 7    | 0.00001 | 5.0678    | 0.00035     | 0.00003 | 0.00000 |
| beta-Alanine metabolism                     | 21            | 8    | 0.00001 | 5.0623    | 0.00035     | 0.00003 | 0.55970 |

|                                        |    |    |         |        |         |         |         |
|----------------------------------------|----|----|---------|--------|---------|---------|---------|
| Porphyrin and chlorophyll metabolism   | 30 | 3  | 0.00001 | 4.8985 | 0.00049 | 0.00004 | 0.02799 |
| D-Glutamine and D-glutamate metabolism | 6  | 2  | 0.00002 | 4.7804 | 0.00063 | 0.00005 | 0.50000 |
| Nitrogen metabolism                    | 6  | 2  | 0.00002 | 4.7804 | 0.00063 | 0.00005 | 0.00000 |
| Tyrosine metabolism                    | 42 | 11 | 0.00005 | 4.309  | 0.00177 | 0.00013 | 0.20399 |
| Biotin metabolism                      | 10 | 2  | 0.00012 | 3.9162 | 0.00424 | 0.00032 | 0.20000 |
| Cysteine and methionine metabolism     | 33 | 9  | 0.00017 | 3.7748 | 0.00571 | 0.00042 | 0.50713 |
| Propanoate metabolism                  | 23 | 5  | 0.00035 | 3.4516 | 0.01167 | 0.00085 | 0.04061 |
| Thiamine metabolism                    | 7  | 1  | 0.00047 | 3.329  | 0.01500 | 0.00107 | 0.00000 |
| Tryptophan metabolism                  | 41 | 9  | 0.00053 | 3.278  | 0.01635 | 0.00116 | 0.55537 |
| Phenylalanine metabolism               | 10 | 5  | 0.00082 | 3.0854 | 0.02465 | 0.00174 | 0.35714 |



**Table S9.** Details of pathway analysis for the South Korean cohort, only values with p-adjust <0.05 are included. The 'Total' column equates to the total number of compounds in the given pathway and the 'Hits' are compounds from this dataset that match to a given pathway. The p-adjust values are adjusted Raw p-values following the Holm-Bonferroni method. FDR is false discovery rate adjusted p-value and the Impact is the impact value was calculated from pathway topology analysis

| Pathway                                          | Total<br>Cmpd | Hits | Raw p   | -LOG10(p) | Holm<br>adjust | FDR     | Impact  |
|--------------------------------------------------|---------------|------|---------|-----------|----------------|---------|---------|
| Glyoxylate<br>and<br>dicarboxylate<br>metabolism | 32            | 13   | 0.00035 | 3.4547    | 0.01930        | 0.00764 | 0.36245 |
| Pyruvate<br>metabolism                           | 22            | 5    | 0.00040 | 3.3963    | 0.02168        | 0.00764 | 0.29859 |
| Histidine<br>metabolism                          | 16            | 8    | 0.00053 | 3.2725    | 0.02830        | 0.00764 | 0.67212 |
| Glycerolipid<br>metabolism                       | 16            | 3    | 0.00056 | 3.2554    | 0.02888        | 0.00764 | 0.33022 |

**Table S10.** Details of pathway analysis for the *B+* vs *B-* samples, only values with p-adjust <0.05 are included. The ‘Total’ column equates to the total number of compounds in the given pathway and the ‘Hits’ are compounds from this dataset that match to a given pathway. The p-adjust values are adjusted Raw p-values following the Holm-Bonferroni method. FDR is false discovery rate adjusted p-value and the Impact is the impact value was calculated from pathway topology analysis

| Pathway                                     | Total<br>Cmpd | Hits | Raw<br>p           | -LOG10(p) | Holm<br>adjust | FDR            | Impact  |
|---------------------------------------------|---------------|------|--------------------|-----------|----------------|----------------|---------|
| Aminoacyl-tRNA biosynthesis                 | 48            | 19   | 9.57<br>E-07       | 6.0191    | 5.26E-<br>05   | 5.26E-<br>05   | 0       |
| Glycine, serine and threonine metabolism    | 33            | 15   | 8.11<br>E-06       | 5.0909    | 0.0004<br>3806 | 0.0002<br>0308 | 0.55748 |
| Phenylalanine metabolism                    | 10            | 5    | 1.42<br>E-05       | 4.8476    | 0.0007<br>5275 | 0.0002<br>0308 | 0.35714 |
| Histidine metabolism                        | 16            | 8    | 1.48<br>E-05       | 4.8306    | 0.0007<br>6803 | 0.0002<br>0308 | 0.67212 |
| Fatty acid biosynthesis                     | 47            | 3    | 1.87<br>E-05       | 4.7271    | 0.0009<br>5612 | 0.0002<br>0622 | 0       |
| Primary bile acid biosynthesis              | 46            | 4    | 6.22<br>E-05       | 4.206     | 0.0031<br>118  | 0.0005<br>3344 | 0.02321 |
| Selenocompound metabolism                   | 20            | 1    | 6.79<br>E-05       | 4.1682    | 0.0033<br>267  | 0.0005<br>3344 | 0       |
| Porphyrin and chlorophyll metabolism        | 30            | 3    | 0.00<br>0151<br>48 | 3.8197    | 0.0072<br>708  | 0.0007<br>9889 | 0.02799 |
| Glycerolipid metabolism                     | 16            | 3    | 0.00<br>0152<br>5  | 3.8167    | 0.0072<br>708  | 0.0007<br>9889 | 0.33022 |
| Valine, leucine and isoleucine biosynthesis | 8             | 7    | 0.00<br>0159<br>5  | 3.7972    | 0.0073<br>37   | 0.0007<br>9889 | 0       |
| beta-Alanine metabolism                     | 21            | 9    | 0.00<br>0176<br>59 | 3.753     | 0.0079<br>465  | 0.0007<br>9889 | 0.61567 |
| Glyoxylate and dicarboxylate metabolism     | 32            | 12   | 0.00<br>0177<br>48 | 3.7508    | 0.0079<br>465  | 0.0007<br>9889 | 0.32012 |

|                                                               |    |    |                    |        |               |                |         |
|---------------------------------------------------------------|----|----|--------------------|--------|---------------|----------------|---------|
| Phenylalanine,<br>tyrosine and<br>tryptophan<br>biosynthesis  | 4  | 2  | 0.00<br>0192<br>07 | 3.7165 | 0.0082<br>59  | 0.0007<br>9889 | 1       |
| Arginine and<br>proline<br>metabolism                         | 38 | 12 | 0.00<br>0203<br>35 | 3.6917 | 0.0085<br>409 | 0.0007<br>9889 | 0.46678 |
| Tyrosine<br>metabolism                                        | 42 | 12 | 0.00<br>0242<br>76 | 3.6148 | 0.0099<br>532 | 0.0008<br>5455 | 0.26866 |
| Pantothenate<br>and CoA<br>biosynthesis                       | 19 | 8  | 0.00<br>0248<br>6  | 3.6045 | 0.0099<br>532 | 0.0008<br>5455 | 0.07857 |
| Ubiquinone and<br>other terpenoid-<br>quinone<br>biosynthesis | 9  | 2  | 0.00<br>0363<br>97 | 3.4389 | 0.0141<br>95  | 0.0011<br>776  | 0       |
| Glycerophospho<br>lipid<br>metabolism                         | 36 | 6  | 0.00<br>0644<br>87 | 3.1905 | 0.0245<br>05  | 0.0019<br>704  | 0.1208  |
| Purine<br>metabolism                                          | 65 | 17 | 0.00<br>0742<br>46 | 3.1293 | 0.0274<br>71  | 0.0021<br>492  | 0.28907 |
| Alanine,<br>aspartate and<br>glutamate<br>metabolism          | 28 | 13 | 0.00<br>1150<br>8  | 2.939  | 0.0414<br>3   | 0.0031<br>648  | 0.75802 |
| Nicotinate and<br>nicotinamide<br>metabolism                  | 15 | 8  | 0.00<br>1291<br>9  | 2.8888 | 0.0452<br>17  | 0.0033<br>836  | 0.77764 |
| Galactose<br>metabolism                                       | 27 | 9  | 0.00<br>1423<br>4  | 2.8467 | 0.0483<br>94  | 0.0035<br>584  | 0.13634 |
