# Supplementary material for: Metabolic Fluctuations in the Human Stool Obtained from Blastocystis Carriers and Non-Carriers
Source: MDPI journal article supplement (doi:10.3390/metabo11120883), 2021-12-17
Supplement: s1 [file s1]

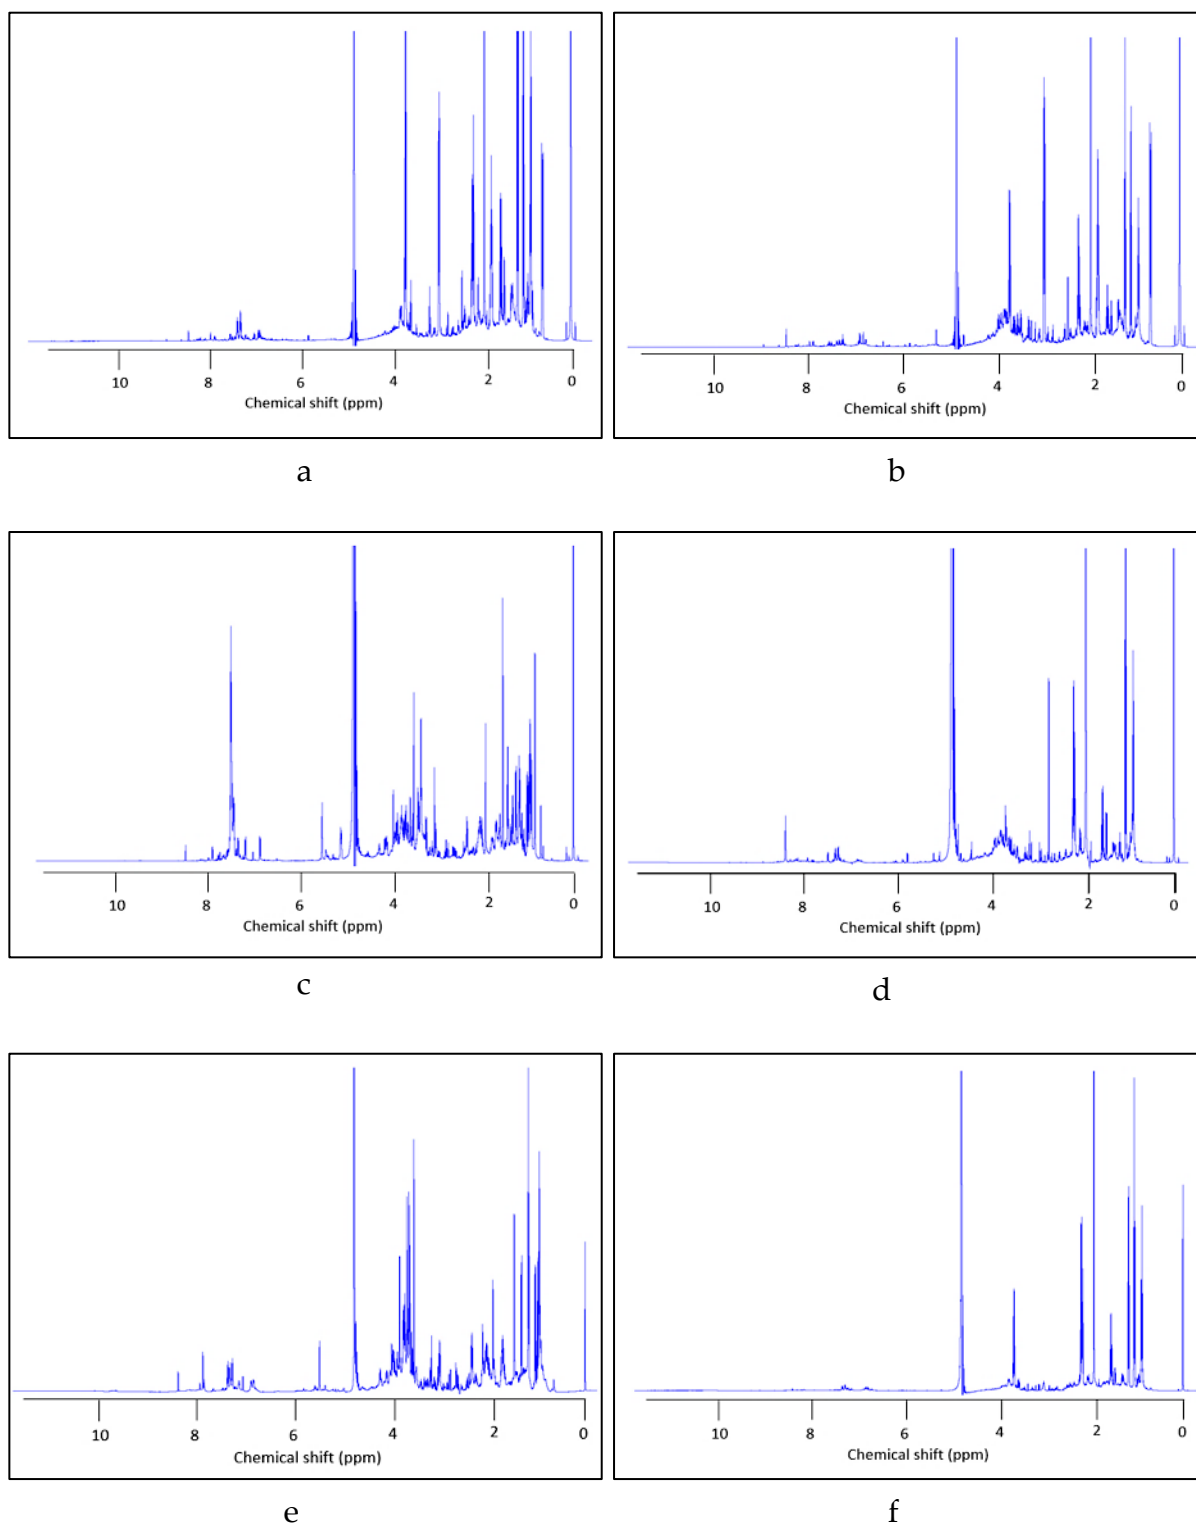

**Figure S1.** Example 1D  $^1\text{H}$  NMR spectra from each region in B- and B+ individuals. *a)* Thailand B- *b)* Thailand B+ *c)* South Korea B- *d)* South Korea B+ *e)* Turkey B- *f)* Turkey B+

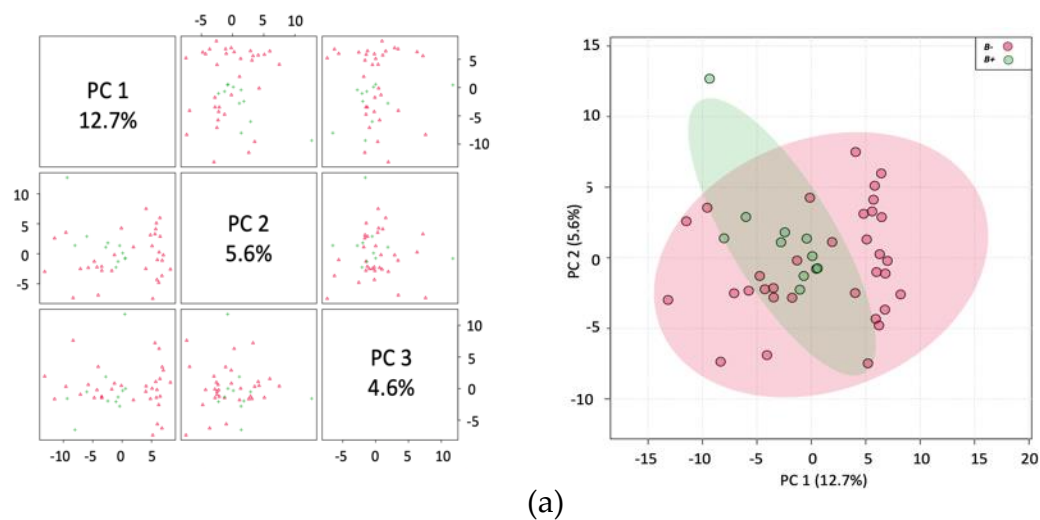

(a)

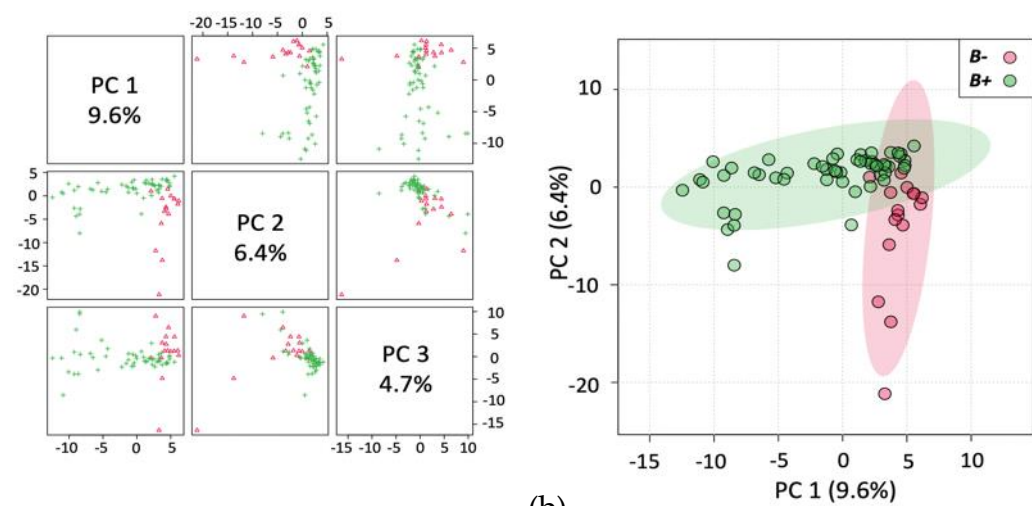

(b)

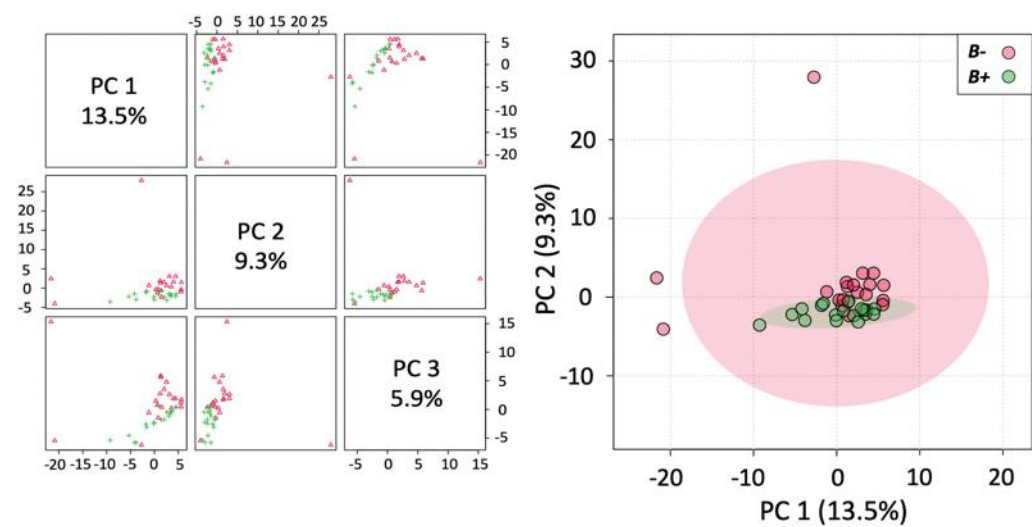

(c)

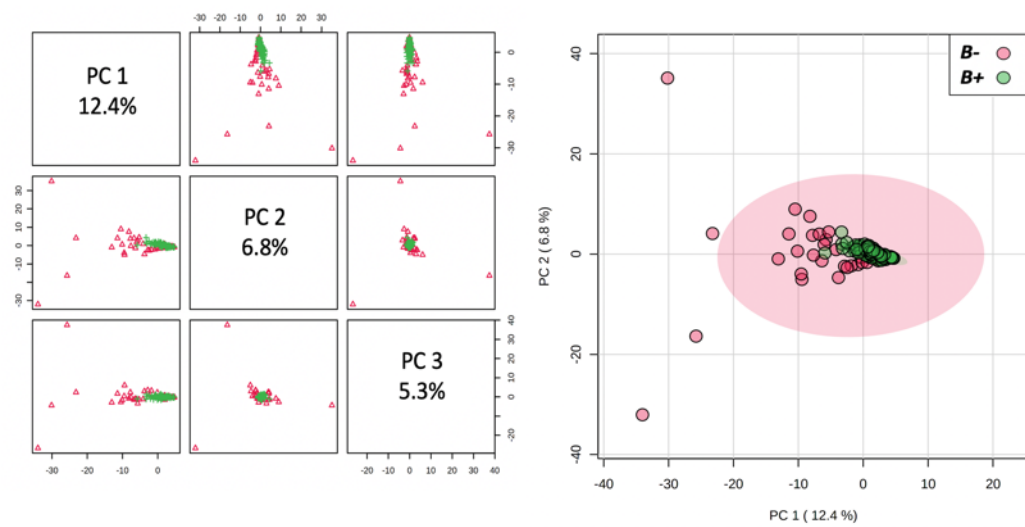

(d)

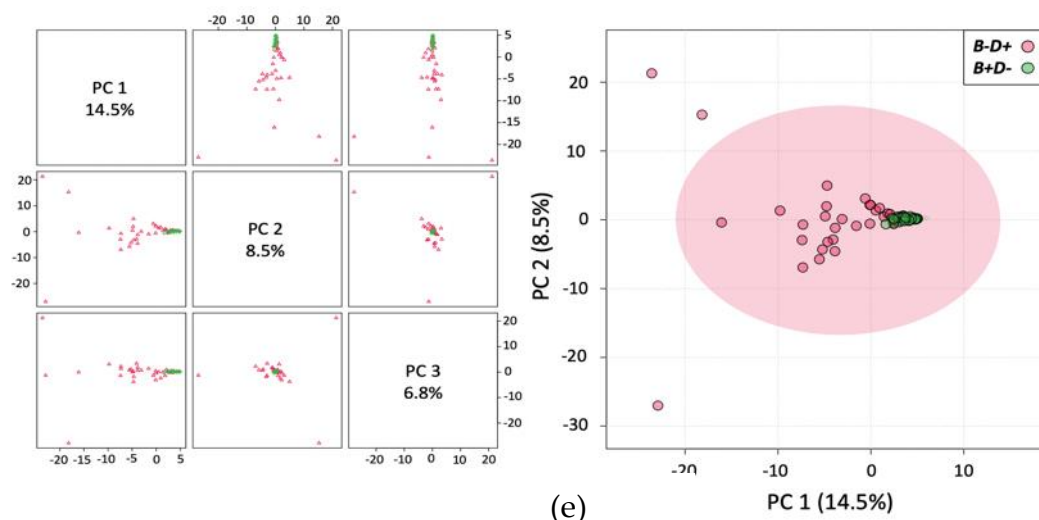

(e)

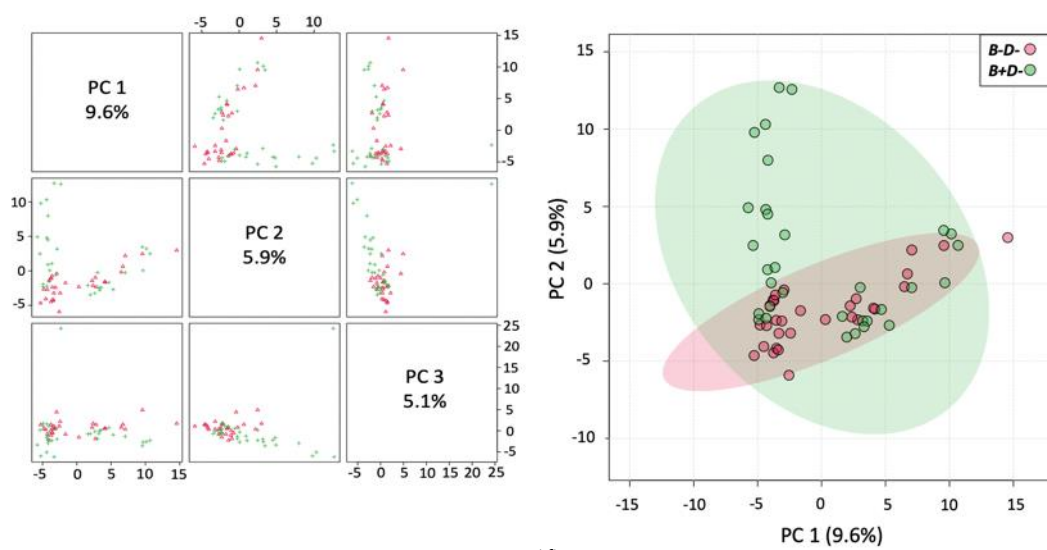

(f)

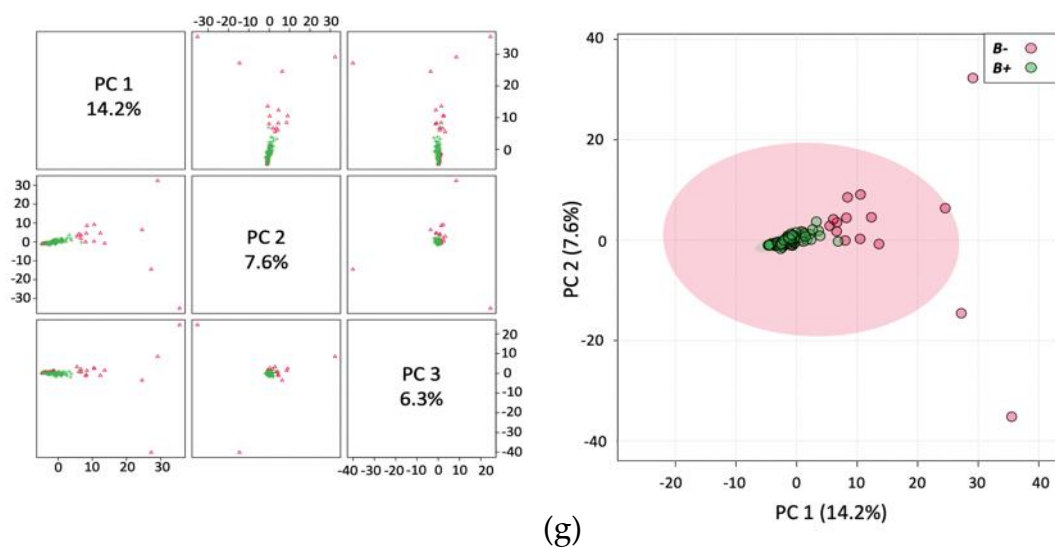

(g)

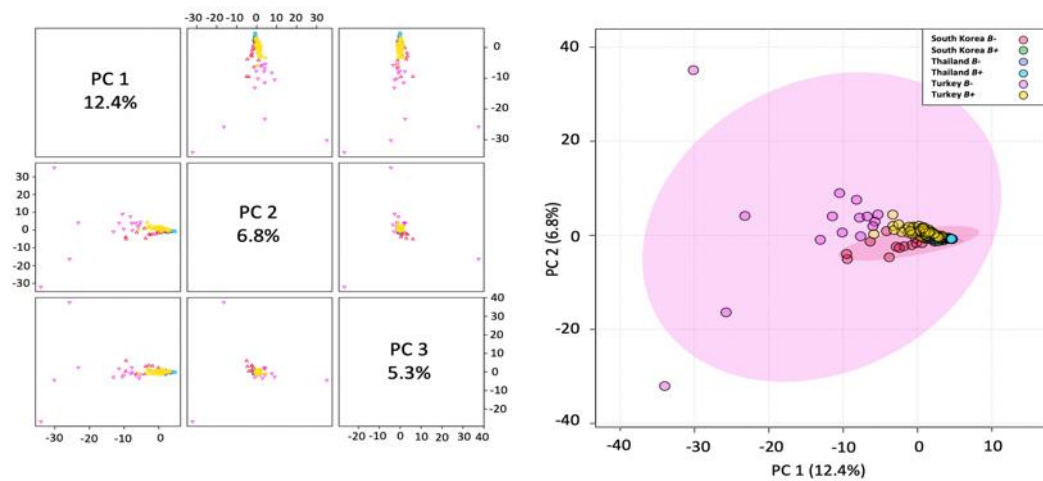

(h)

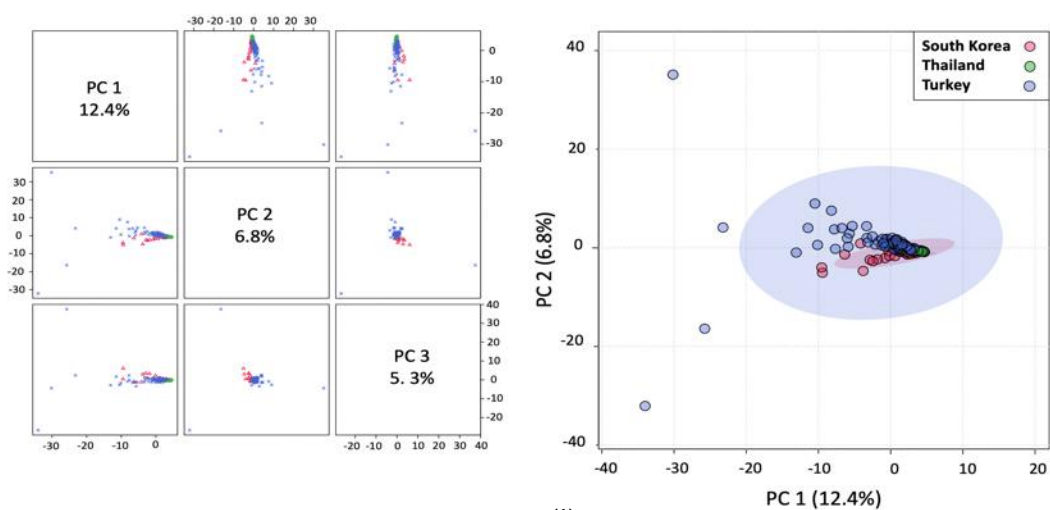

(i)

**Figure S2.** Multivariate analysis showing Unsupervised principal component analysis (PCA) of the normalized metabolite concentrations *a)* Thailand, *b)* Turkey, *c)*

South Korea, *d*) B+ vs B-, *e*) D-B+ vs D+B-, *f*) D-B+ vs D-B-, *g*) B+ vs B- (Korea B-excluded), *h*) Country & *Blastocystis*, *i*) Country.

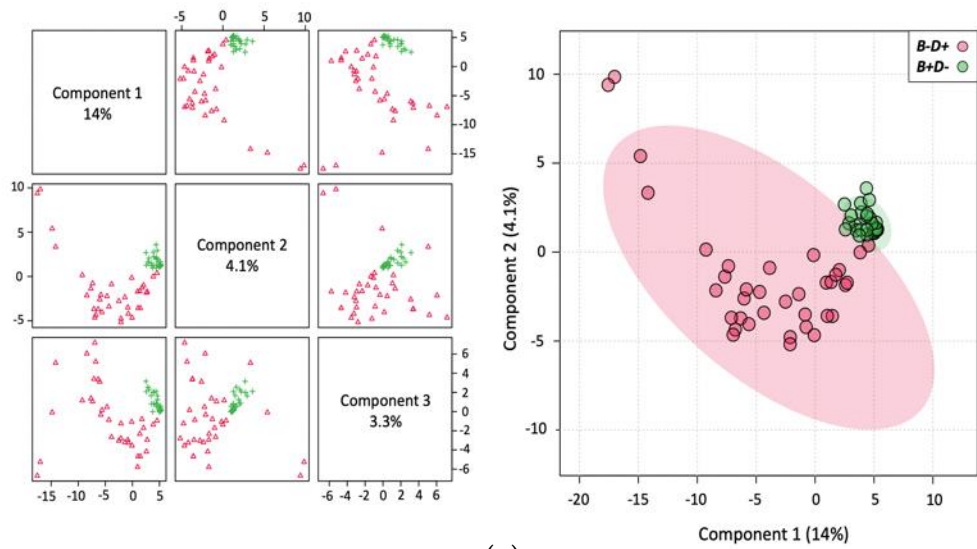

(a)

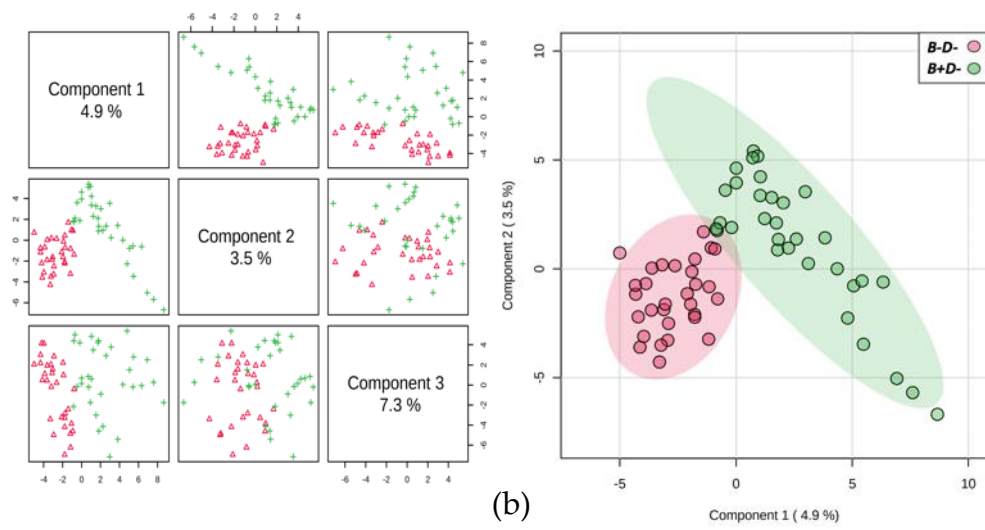

(b)

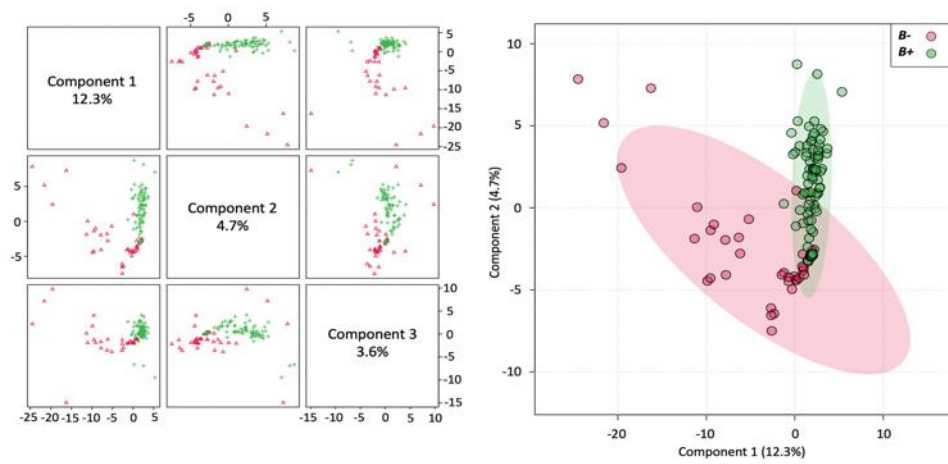

(c)

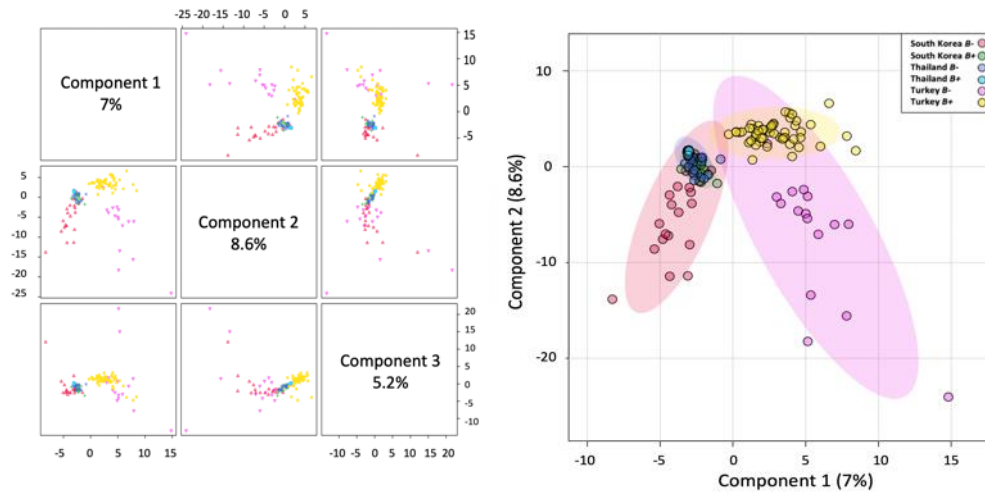

(d)

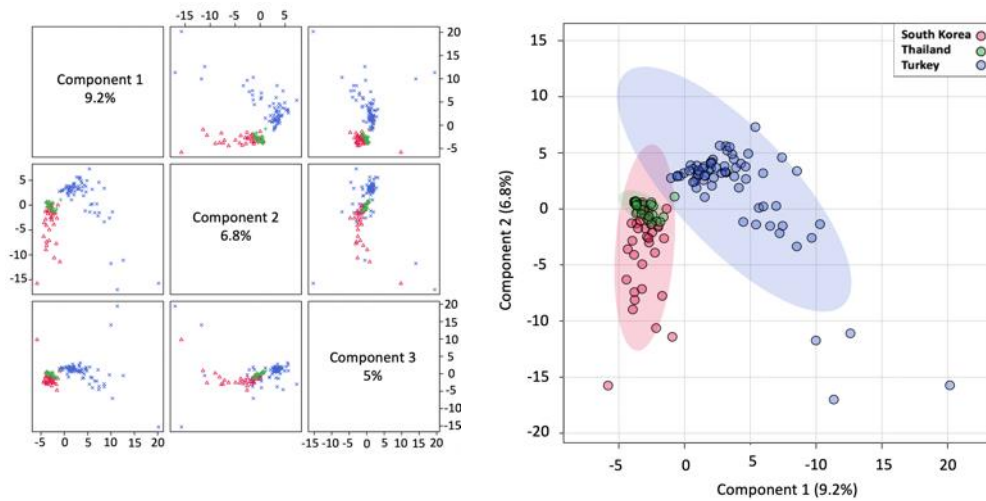

(e)

**Figure S3.** Multivariate analysis showing Partial Least Squares Discriminant Analysis (PLS-DA) *a)* D-B+ vs D+B-, *b)* D-B+ vs D-B-, *c)* B+ vs B- (Korea B- excluded), *d)* Country & *Blastocystis*, *e)* Country



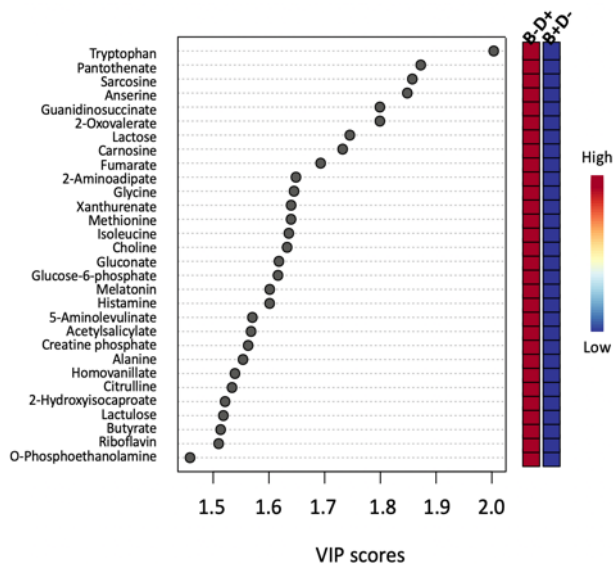

(a)

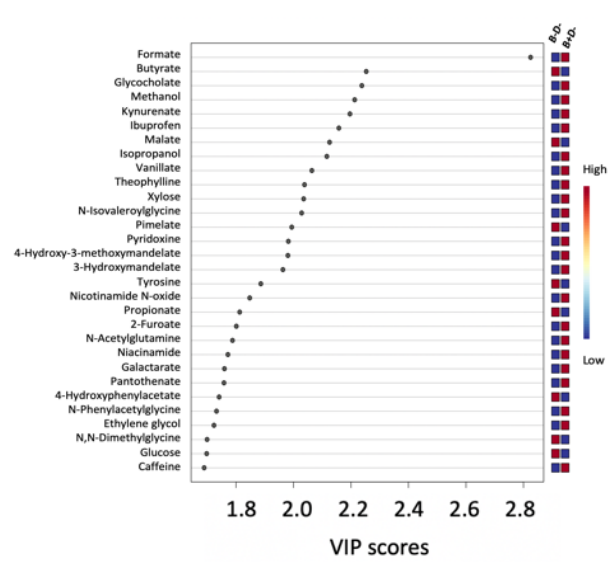

(b)

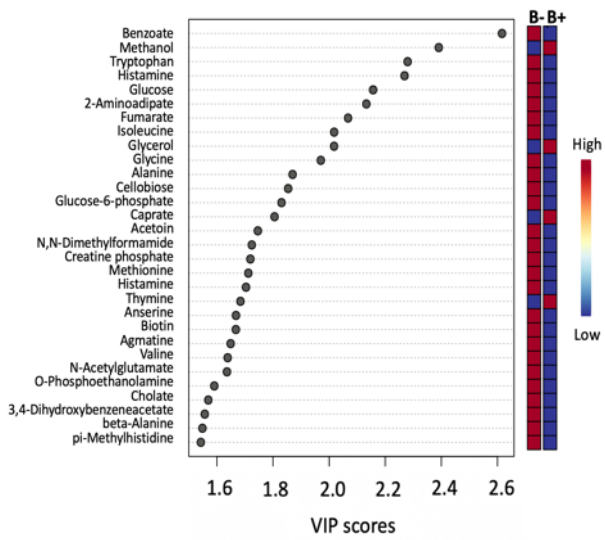

(c)

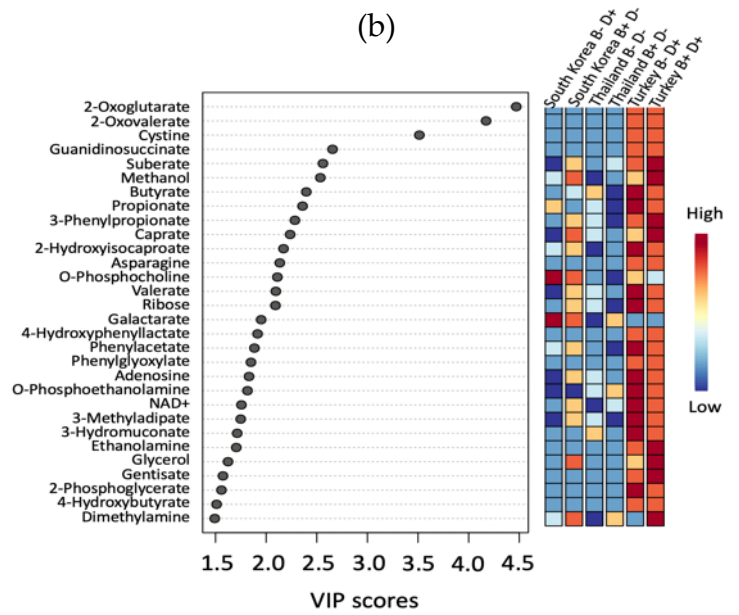

(d)

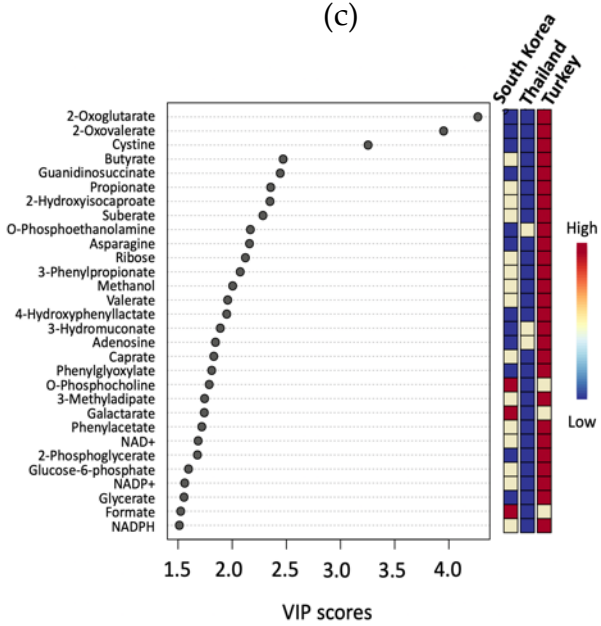

(e)



**Figure S4.** VIP score plot summarizing the 30 most important metabolites determined by the PLS-DA plot. The x-axis indicates the VIP score corresponding to significant metabolites on the y-axis. The coloured boxes on the right represent the relative concentration of the metabolite. *a)* D-B+ vs D+B-, *b)* D-B+ vs D-B-, *c)* B+ vs B- (Korea B- excluded), *d)* Country & *Blastocystis*, *e)* Country
